# Supplementary material
Source: PubMed Central journal article supplement (PMC9133269)
Supplement: NIHMS1763785-supplement-1.pdf [file NIHMS1763785-supplement-1.pdf]

# Appendix

## Table of Contents

|                                          |   |
|------------------------------------------|---|
| Methods factors used in CFA models ..... | 2 |
|------------------------------------------|---|

## Methods factors used in confirmatory factor analysis models

Methods factors were added where conceptually appropriate to improve model fit of confirmatory factor analysis (CFA) models. These factors describe the common correlation between individual test items that is independent or orthogonal to the latent variable of interest in the CFA models.

### **Methods factors for general cognitive functioning:**

1. *Methods factor 1:* Trail-making test, part A, letter cancellation
2. *Methods factor 2:* CERAD word list immediate recall, delayed recall, and recognition
3. *Methods factor 3:* Logical memory immediate and delayed recall

### **Methods factors for executive functioning:**

1. *Methods Factor 1:* Ravens progressive matrices, number series, letter cancellation
